# Supplementary material for: A novel disorder involving dyshematopoiesis, inflammation, and HLH due to aberrant CDC42 function
Source: PubMed Central journal article supplement — J Exp Med. 2019 Oct 10;216(12):2778–99. doi: 10.1084/jem.20190147 (PMC6888978; doi:10.1084/jem.20190147), 2019-10-10
Supplement: JEM_20190147_sm.pdf [file JEM_20190147_sm.pdf]

## Supplemental material

Lam et al., <https://doi.org/10.1084/jem.20190147>

Table S1. **Clinical laboratory data**

|                                  | <b>Pt 1</b> |                       | <b>Pt 2</b> |                       |
|----------------------------------|-------------|-----------------------|-------------|-----------------------|
|                                  | <b>1 mo</b> | <b>Full-blown HLH</b> | <b>1 mo</b> | <b>Full-blown HLH</b> |
| WBC ( $10^3/\mu\text{l}$ )       | 2,430       | 410                   | 4,460       | 920                   |
| No. of neutrophils               | 150         | 70                    | 660         | 50                    |
| No. of lymphocytes               | 1,870       | 260                   | 2,970       | 610                   |
| Hemoglobin (g/dl)                | 9.9         | 9.8                   | 10.3        | 9.3                   |
| Platelets ( $10^3/\mu\text{l}$ ) | 10          | 17                    | 29          | 38                    |
| ALT (IU/liter)                   | 15          | 3,952                 | 38          | 403                   |
| AST (IU/liter)                   | 17          | 8,440                 | 25          | 1,254                 |
| LDH (IU/liter)                   | 421         | 23,966                | 869         | 17,705                |
| $\gamma$ GT (IU/liter)           | 151         | 75                    | 430         | 1,189                 |
| Fibrinogen (mg/dl)               | 281         | 312                   | 489         | 212                   |
| D-dimer ( $\mu\text{g/ml}$ )     | 7.77        | 10.52                 | 3.43        | 17.90                 |
| Triglycerides (mg/dl)            | 449         | 443                   | 358         | 669                   |
| Ferritin (ng/ml)                 | 2,594       | 155,440               | 2,763       | 609,760               |
| CRP (mg/dl)                      | 14.76       | 42.56                 | 13.10       | 43.65                 |

Per the referral note from Dr. H.C. Erichsen, Pt 3 had severe anemia and thrombocytopenia at birth, usually increased CRP between 50 and 200 mg/dl, ESR 60 mm/h at birth, and >100 mm/h afterwards. Ferritin at birth ranged between 2,000 and 2,500 ng/ml and increased to >100,000 ng/ml with subsequent HLH episodes. Procalcitonin was low. WBC, white blood cell; CRP, C-reactive protein; ESR, erythrocyte sedimentation rate;  $\gamma$ GT, gamma-glutamyl transferase; ALT, alanine aminotransferase; AST, aspartate transaminase; LDH, lactic acid dehydrogenase.

Table S3. **WES/WGS metrics and data output**

| <b>Pt 1</b>                                                            |                                   |
|------------------------------------------------------------------------|-----------------------------------|
| WES enrichment kit                                                     | Agilent SureSelect AllExon v5+UTR |
| Sequencing platform                                                    | Illumina HiSeq                    |
| No. of reads                                                           | 115,179,795                       |
| Mean read length (bases)                                               | 100                               |
| Target region coverage (%)                                             |                                   |
| >2×                                                                    | 97.7                              |
| >20×                                                                   | 86                                |
| >50×                                                                   | 67                                |
| Average depth on target                                                | 91×                               |
| Total number of high-quality variants                                  | 127,405                           |
| Variants with effect on CDS or affecting splice sites <sup>a</sup>     | 14,224                            |
| Private, clinically associated and low-frequency variants <sup>b</sup> | 338                               |
| Putative disease genes (autosomal recessive trait)                     | 3                                 |
| Filtered candidate genes <sup>c</sup>                                  | 2 <sup>d</sup>                    |
| Putative disease genes (de novo)                                       | 4                                 |
| Filtered candidate genes <sup>c</sup>                                  | 4 <sup>e</sup>                    |
| <b>Pt 3</b>                                                            |                                   |
| Sequencing platform                                                    | Illumina HiSeq                    |
| Capture design                                                         | HGSC Core Rebal                   |
| Unique aligned MB                                                      | 9,767                             |
| Total MB                                                               | 10,427                            |
| Total read (1.8)                                                       | 116,780,944                       |
| Reads PF (1.8)                                                         | 103,246,033                       |
| Median insert size (bases)                                             | 180                               |
| Mode insert size (bases)                                               | 162                               |
| Duplicate reads (%)                                                    | 7                                 |
| Average coverage                                                       | 114                               |
| Coverage bases                                                         |                                   |
| ≥1×                                                                    | 96                                |
| ≥10×                                                                   | 91                                |
| ≥20×                                                                   | 87                                |
| ≥40×                                                                   | 79                                |
| <b>Pt 4</b>                                                            |                                   |
| WGS preparation protocol                                               | TruSeq DNA PCR-free protocol      |
| Sequencing platform                                                    | Illumina HiSeq                    |
| Target region coverage (%)                                             |                                   |
| >10×                                                                   | 99.12                             |
| >20×                                                                   | 95.4                              |
| Average depth on target                                                | 34×                               |
| Putative disease genes (autosomal recessive trait)                     | 4 <sup>f</sup>                    |
| Putative disease genes (de novo)                                       | 4 <sup>g</sup>                    |

Pt 3 was identified through a shared CMG database, and studies for Pt 3 included trio WES (performed in Oslo, Norway). Pt 3 then underwent repeat WES at Baylor College of Medicine (output shown in table above) followed by Sanger sequence confirmation in both parents. HGSC, Human Genome Sequencing Center; MB, megabases; PF, pass-filter.

<sup>a</sup>High-quality nonsynonymous single-nucleotide variants and indels within coding exons and splice sites ( $\pm 8$  bases).

<sup>b</sup>High-quality, functionally relevant variants and unknown, private, or low-frequency variants (gnomAD minor allele frequency  $< 0.1\%$  and frequency  $< 1\%$  within our  $\sim 1,300$ -exome database).

<sup>c</sup>Functional impact of variants was assessed by CADD v.1.3 (<http://cadd.gs.washington.edu/>), dbNSFP M-CAP v.1.0 (<http://sites.google.com/site/jpopgen/dbNSFP>), and Intervar (<http://wintervar.wglab.org>) v0.1.7.

Variants predicted as benign or likely benign by Intervar were discarded, and only those with a CADD score  $> 15$  or an M-CAP score  $> 0.025$  were retained.

<sup>d</sup>ATXN7 (c.113\_118dupAGCAGC, p.Gln38\_Gln39dup) and NOP9

(c.501\_509dupGGAGGAGGA, p.Glu167\_Glu169dup).

<sup>e</sup>CDC42 (c.556C>T, p.Arg186Cys), TTN (c.57305T>C, p.Ile19102Thr), GPR158 (c.1976A>G, p.Tyr359Cys), and PLEKHG3 (c.2650C>A, p.Leu884Met).

<sup>f</sup>Including the following genes: *DHTKD1*, *LPL*, *GALC*, and *CHSY1*.

<sup>g</sup>Including the following genes: *LAMA3*, *ADAMTSL2*, *CDC42*, and *FTCD*.

Table S4. **Vulval phenotypes in *C. elegans* expressing WT CDC-42 or the disease-associated mutants**

| Genotype           | Transgene                     | Pvl (%)             | Muv (%)            | Vul (%)             | n      |
|--------------------|-------------------------------|---------------------|--------------------|---------------------|--------|
| WT                 | —                             | 0.5                 | 0                  | 0                   | >1,000 |
| WT                 | Empty vector                  | 1                   | 0                  | 0                   | 201    |
| WT                 | <i>cdc-42<sup>WT</sup></i>    | 21.1 <sup>a</sup>   | 3.3 <sup>b</sup>   | 0                   | 399    |
| WT                 | <i>cdc-42<sup>R68Q</sup></i>  | 11.6 <sup>a,c</sup> | 3.2 <sup>b</sup>   | 0                   | 249    |
| WT                 | <i>cdc-42<sup>A159V</sup></i> | 38.8 <sup>a,d</sup> | 7.1 <sup>b,e</sup> | 0                   | 196    |
| WT                 | <i>cdc-42<sup>K186C</sup></i> | 10.6 <sup>a,d</sup> | 2.7 <sup>b</sup>   | 0                   | 698    |
| <i>let-23(sy1)</i> | —                             | 0                   | 0                  | 79.1                | 134    |
| <i>let-23(sy1)</i> | <i>cdc-42<sup>WT</sup></i>    | 0                   | 0                  | 50.1 <sup>f</sup>   | 192    |
| <i>let-23(sy1)</i> | <i>cdc-42<sup>R68Q</sup></i>  | 0                   | 0                  | 48.7 <sup>f</sup>   | 150    |
| <i>let-23(sy1)</i> | <i>cdc-42<sup>A159V</sup></i> | 0                   | 0                  | 16.1 <sup>f,g</sup> | 186    |
| <i>let-23(sy1)</i> | <i>cdc-42<sup>K186C</sup></i> | 0                   | 0                  | 61.7 <sup>h,i</sup> | 135    |

*Cdc-42* alleles were expressed under the control of the inducible *hsp16.41* promoter. Animals were grown at 20°C and heat shocked at late-L2/early-L3 larval stages. *n* indicates the number of animals scored. Pvl, Muv, and Vul phenotypes are expressed as percentage of adult animals with a Pvl, displaying ectopic pseudovulvae, or completely lacking the vulva, respectively. *Let-23(sy1)* is a hypomorphic allele of *let-23/EGFR*.

In all comparisons, P values were calculated using a two-tailed Fisher's exact test.

<sup>a</sup>Significantly different from animals expressing the empty vector ( $P < 1.2e^{-6}$ ).

<sup>b</sup>Significantly different from animals expressing the empty vector ( $P < 0.05$ ).

<sup>c</sup>Significantly different from animals expressing *cdc-42<sup>WT</sup>* ( $P < 0.005$ ).

<sup>d</sup>Significantly different from animals expressing *cdc-42<sup>WT</sup>* ( $P < 0.00002$ ).

<sup>e</sup>Significantly different from animals expressing *cdc-42<sup>WT</sup>* ( $P < 0.05$ ).

<sup>f</sup>Significantly different from *let-23(sy1)* animals ( $P < 7.8e^{-7}$ ).

<sup>g</sup>Significantly different from *let-23(sy1)* animals expressing *cdc-42<sup>WT</sup>* ( $P < 3.2e^{-6}$ ).

<sup>h</sup>Significantly different from *let-23(sy1)* animals ( $P < 0.005$ ).

<sup>i</sup>Significantly different from *let-23(sy1)* animals expressing *cdc-42<sup>WT</sup>* ( $P < 0.05$ ).

Table S5. **Clonogenic assay of BM cells from Pt 1**

|                                                      | BFU-E | CFU-GM | CFU-G | CFU-M | CFU-GEMM |
|------------------------------------------------------|-------|--------|-------|-------|----------|
| Pt 1 (CFU/2 × 10 <sup>5</sup> BM MNCs)               | 6     | 1.5    | 0     | 2.5   | 0        |
| Controls (BM MNCs)                                   | 15–45 | 25–50  | 5–10  | 5–10  | 1–3      |
| Pt 1 (CFU/1 × 10 <sup>3</sup> BM CD34 <sup>+</sup> ) | 10    | 4      | ND    | ND    | ND       |
| Controls (BM CD34 <sup>+</sup> )                     | 8–84  | 25–93  | ND    | ND    | ND       |

Mononuclear cells (MNCs) or purified CD34<sup>+</sup> cells from BM aspirate were plated in a clonogenic assay in the presence of Methocult and 0.9% methylcellulose and scored for hematopoietic colonies after 14 d. Colony number was greatly reduced compared to normal BM cultures of age-matched healthy subjects. BFU-E, erythroid burst-forming units; CFU-GM, CFU-granulocyte/monocyte; CFU-G, CFU-granulocyte; CFU-M, CFU-monocyte; CFU-GEMM, CFU-granulocyte/erythrocyte/monocyte/megakaryocyte.

Table S2 is provided online as a separate Excel file and shows hematological and immunological profiles.
